# Supplementary material for: Development and Validation of a Prealbumin-Bilirubin Model for Prognostic Prediction in Intermediate Hepatocellular Carcinoma Undergoing Transarterial Chemoembolization
Source: Research Square preprint supplement (doi:10.21203/rs.3.rs-5624467/v1), 2025-05-06
Supplement: Supplementary file 1 [file 6213abb0e017bc6e71f02c10.docx]

**Supported Materials**


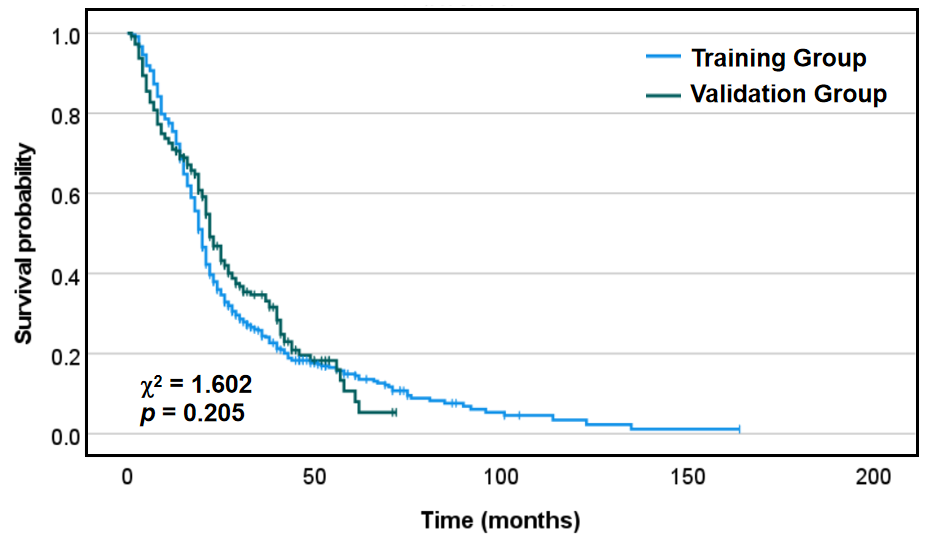
**Figure S1.** Kaplan-Meier curves of the two cohorts.

**Table S1**. Hazard ratios of PA and TBIL

|  | HR | 95% CI | P Value |
| --- | --- | --- | --- |
| Prealbumin | 0.985 | 0.983 - 0.9879 | ＜0.001 |
| Total Bilirubin | 1.056 | 1.042 - 1.0714 | ＜0.001 |


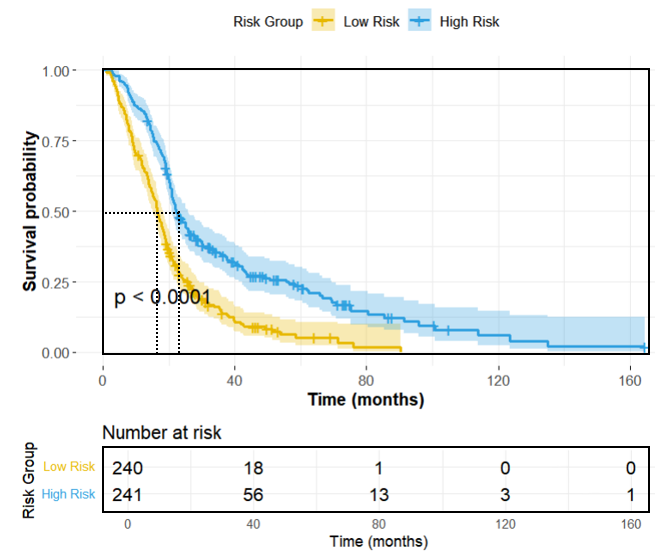


**Figure S2.** Kaplan-Meier curves of low-risk and high-risk groups.


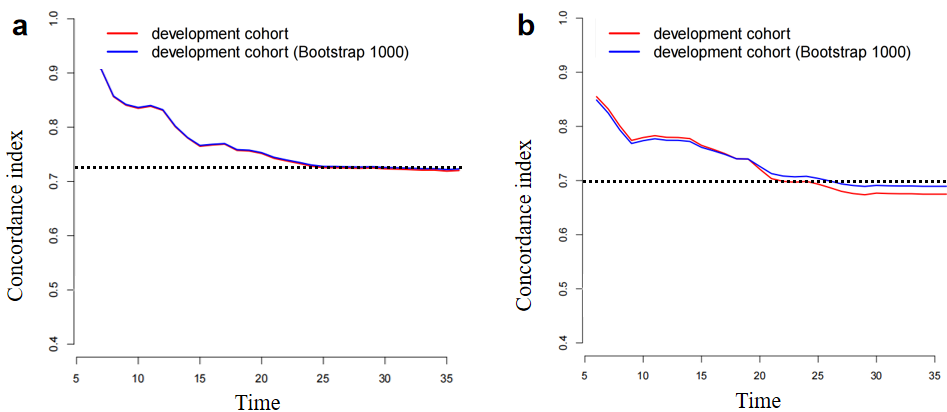


**Figure S3.** Bootstrap results of the two cohorts. (a) Training cohort, (b) Validation cohort.
